# Supplementary material for: Spectroscopic and electrochemical studies on the evaluation of the radical scavenging activities of luteolin by chelating iron
Source: Royal Society of Chemistry journal article supplement (doi:10.1039/c4ra01396d), 2014-01-01
Supplement: c4ra01396d1.pdf [file c4ra01396d1.pdf]

## Supplementary Information

### Spectroscopic and electrochemical studies on the evaluation of the radical scavenging activities of luteolin by chelating iron

Ai-Hong Yang<sup>a\*</sup>, Xue-Ying Shi<sup>b</sup>, Xue Li<sup>a</sup>, Fang-Fang Li<sup>b</sup>, Qin-Qin Zhang<sup>b</sup>, Shu-Xin Jiang<sup>b</sup>, Jian-Zhong Cui<sup>b</sup> and Hong-Ling Gao<sup>b</sup>

<sup>a</sup> Tianjin Key Laboratory of Chemistry and Analysis of Chinese Materia Medica, College of Chinese Materia Medica, Tianjin University of Traditional Chinese Medicine, Tianjin 300193, P. R. China

<sup>b</sup> Department of Chemistry, School of Science, Tianjin University, and Collaborative Innovation Center of Chemical Science and Engineering (Tianjin), Tianjin 300072, P. R. China

\*Author to whom correspondence should be addressed. Email:[yah408@163.com](mailto:yah408@163.com)

**S1** Luteolin recovery from luteolin-Fe(III) complex by EDTA (1: complex + 0.2 mmol·L<sup>-1</sup> EDTA; 2: complex + 0.15 mmol·L<sup>-1</sup> EDTA; 3: complex + 0.1 mmol·L<sup>-1</sup> EDTA; 4: luteolin-Fe(III) complex without EDTA.)

**S2** The IR spectrum of luteolin.

**S3** The IR spectrum of luteolin- Fe(III) complex.

**S4** ESI-MS spectrum in the positive mode of luteolin:Fe(III) 1:1 in ethanol solution.

**S5** ESI-MS spectrum in the positive mode of luteolin:Fe(III) 1:2 in ethanol solution.

**S6** Absorbance of malonaldehyde-TBA complex at 532 nm at various Fe(II) concentrations in the presence or absence of EDTA and luteolin.

**S7** Decay of the visible absorbance (518 nm) of DPPH induced by different concentrations of luteolin.

**S8** Decay of the visible absorbance (518 nm) of DPPH induced by different concentrations of luteolin-Fe(III) complex.

**S9** Decay of the visible absorbance (518 nm) of DPPH induced by luteolin-Fe(III) complex(mole ratio 4:1).

**S10** Complex absorbance at 391 nm versus [Fe<sup>3+</sup>]/[Lu] concentrations.

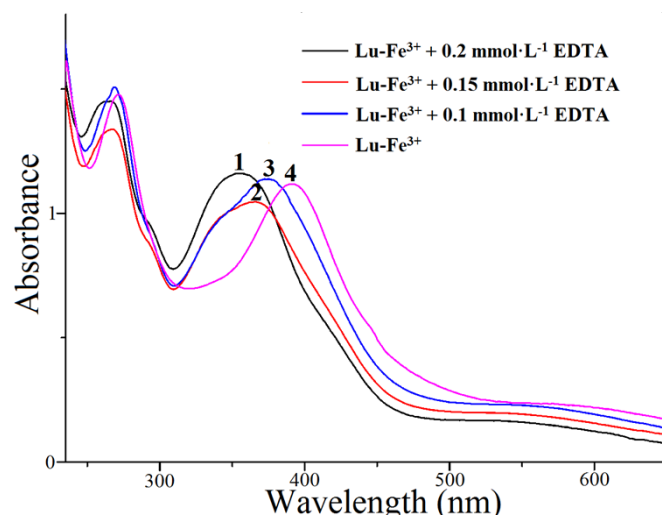

**Fig.S1** Luteolin recovery from luteolin-Fe(III) complex by EDTA (1: complex + 0.2 mmol·L<sup>-1</sup> EDTA; 2: complex + 0.15 mmol·L<sup>-1</sup> EDTA; 3: complex + 0.1 mmol·L<sup>-1</sup> EDTA; 4: luteolin-Fe(III) complex without EDTA.)

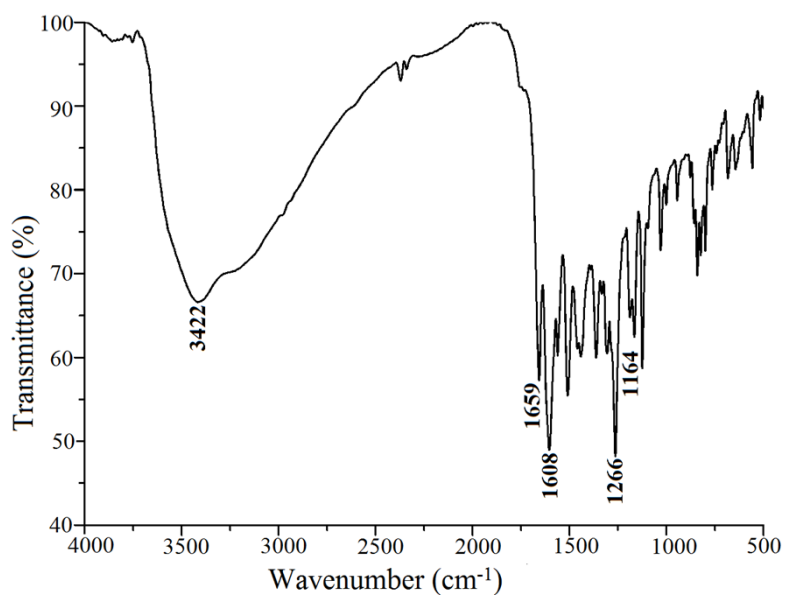

**Fig.S2** The IR spectrum of luteolin.

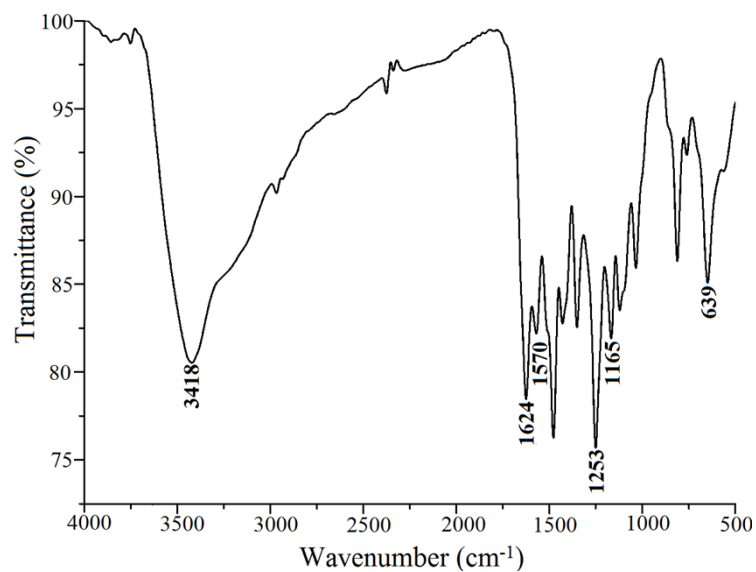

**Fig.S3** The IR spectrum of luteolin-Fe(III) complex.

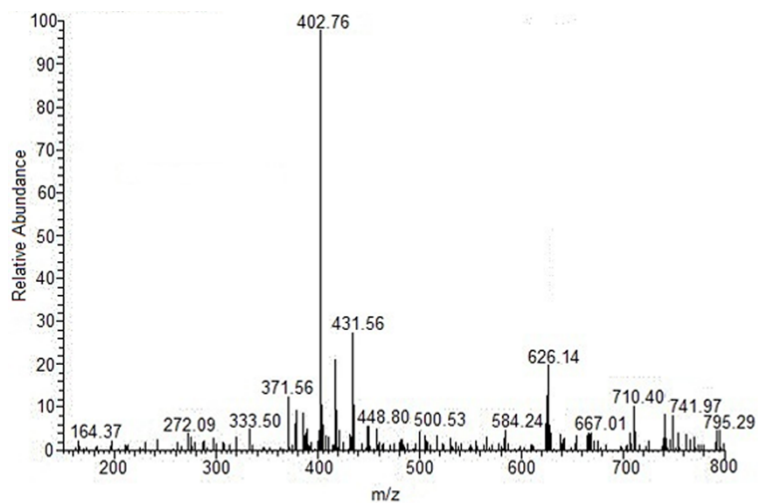

**Fig. S4** ESI-MS spectrum in the positive mode of luteolin:Fe(III) 1:1 in ethanol solution.

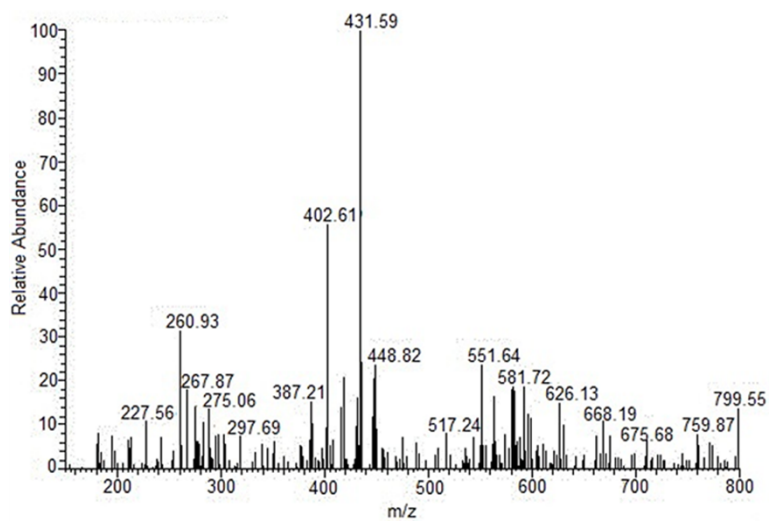

**Fig. S5** ESI-MS spectrum in the positive mode of luteolin:Fe(III) 1:2 in ethanol solution.

**Table.S6** Absorbance of malonaldehyde-TBA complex at 532 nm at various Fe(II) concentrations in the presence or absence of EDTA and luteolin.

| The concentration of Fe <sup>2+</sup> | Absorbance | Absorbance after the addition of EDTA of 0.4 mmol·L <sup>-1</sup> | Absorbance after the addition of luteolin of 0.4 mmol·L <sup>-1</sup> | Absorbance after the addition of EDTA and luteolin of 0.4 mmol·L <sup>-1</sup> |
|---------------------------------------|------------|-------------------------------------------------------------------|-----------------------------------------------------------------------|--------------------------------------------------------------------------------|
| 0.05                                  | 0.354      | 0.045                                                             | 0.142                                                                 | 0.026                                                                          |
| 0.1                                   | 0.392      | 0.067                                                             | 0.169                                                                 | 0.028                                                                          |
| 0.15                                  | 0.402      | 0.126                                                             | 0.215                                                                 | 0.025                                                                          |
| 0.2                                   | 0.461      | 0.173                                                             | 0.258                                                                 | 0.023                                                                          |
| 0.25                                  | 0.462      | 0.176                                                             | 0.278                                                                 | 0.028                                                                          |
| 0.3                                   | 0.465      | 0.202                                                             | 0.284                                                                 | 0.026                                                                          |
| 0.35                                  | 0.469      | 0.191                                                             | 0.296                                                                 | 0.068                                                                          |
| 0.4                                   | 0.512      | 0.186                                                             | 0.328                                                                 | 0.087                                                                          |
| 0.45                                  | 0.517      | 0.229                                                             | 0.338                                                                 | 0.106                                                                          |
| 0.5                                   | 0.525      | 0.251                                                             | 0.357                                                                 | 0.119                                                                          |
| 0.05                                  | 0.351      | 0.042                                                             | 0.140                                                                 | 0.025                                                                          |
| 0.1                                   | 0.396      | 0.071                                                             | 0.165                                                                 | 0.026                                                                          |
| 0.15                                  | 0.405      | 0.121                                                             | 0.213                                                                 | 0.027                                                                          |
| 0.2                                   | 0.458      | 0.170                                                             | 0.255                                                                 | 0.025                                                                          |
| 0.25                                  | 0.463      | 0.175                                                             | 0.273                                                                 | 0.031                                                                          |
| 0.3                                   | 0.467      | 0.206                                                             | 0.280                                                                 | 0.026                                                                          |
| 0.35                                  | 0.472      | 0.195                                                             | 0.299                                                                 | 0.065                                                                          |
| 0.4                                   | 0.510      | 0.181                                                             | 0.325                                                                 | 0.089                                                                          |
| 0.45                                  | 0.516      | 0.225                                                             | 0.334                                                                 | 0.105                                                                          |
| 0.5                                   | 0.528      | 0.248                                                             | 0.359                                                                 | 0.121                                                                          |
| 0.05                                  | 0.357      | 0.045                                                             | 0.145                                                                 | 0.027                                                                          |
| 0.1                                   | 0.391      | 0.069                                                             | 0.163                                                                 | 0.029                                                                          |
| 0.15                                  | 0.407      | 0.123                                                             | 0.215                                                                 | 0.024                                                                          |
| 0.2                                   | 0.457      | 0.169                                                             | 0.259                                                                 | 0.022                                                                          |
| 0.25                                  | 0.465      | 0.179                                                             | 0.275                                                                 | 0.027                                                                          |
| 0.3                                   | 0.468      | 0.200                                                             | 0.286                                                                 | 0.029                                                                          |
| 0.35                                  | 0.470      | 0.197                                                             | 0.293                                                                 | 0.066                                                                          |
| 0.4                                   | 0.515      | 0.184                                                             | 0.323                                                                 | 0.085                                                                          |
| 0.45                                  | 0.519      | 0.223                                                             | 0.333                                                                 | 0.108                                                                          |
| 0.5                                   | 0.529      | 0.255                                                             | 0.354                                                                 | 0.115                                                                          |

**Table.S7** Decay of the visible absorbance (518 nm) of DPPH induced by different concentrations of luteolin.

| Time (s) | Absorbance at Lu/DPPH=0.15 | Absorbance at Lu/DPPH=0.25 | Absorbance at Lu/DPPH=0.75 | Absorbance at Lu/DPPH=1.0 | Absorbance at Lu/DPPH=1.5 |
|----------|----------------------------|----------------------------|----------------------------|---------------------------|---------------------------|
| 0        | 0.798                      | 0.798                      | 0.798                      | 0.798                     | 0.798                     |
| 60       | 0.647                      | 0.546                      | 0.373                      | 0.26                      | 0.204                     |

---

|     |       |       |       |       |       |
|-----|-------|-------|-------|-------|-------|
| 120 | 0.631 | 0.515 | 0.33  | 0.232 | 0.182 |
| 180 | 0.617 | 0.471 | 0.272 | 0.196 | 0.155 |
| 240 | 0.596 | 0.421 | 0.226 | 0.178 | 0.12  |
| 300 | 0.583 | 0.411 | 0.217 | 0.157 | 0.12  |
| 360 | 0.571 | 0.396 | 0.19  | 0.157 | 0.12  |
| 420 | 0.561 | 0.377 | 0.19  | 0.157 | 0.12  |
| 480 | 0.555 | 0.377 | 0.19  | 0.157 | 0.12  |
| 540 | 0.555 | 0.377 | 0.19  | 0.157 | 0.12  |
| 600 | 0.555 | 0.377 | 0.19  | 0.157 | 0.12  |
| 660 | 0.555 | 0.377 | 0.19  | 0.157 | 0.12  |
| 720 | 0.555 | 0.377 | 0.19  | 0.157 | 0.12  |
| 780 | 0.555 | 0.377 | 0.19  | 0.157 | 0.12  |
| 840 | 0.555 | 0.377 | 0.19  | 0.157 | 0.12  |
| 900 | 0.555 | 0.377 | 0.19  | 0.157 | 0.12  |
| 960 | 0.555 | 0.377 | 0.19  | 0.157 | 0.12  |
| 0   | 0.801 | 0.801 | 0.801 | 0.801 | 0.801 |
| 60  | 0.653 | 0.551 | 0.378 | 0.267 | 0.201 |
| 120 | 0.630 | 0.519 | 0.335 | 0.236 | 0.184 |
| 180 | 0.613 | 0.477 | 0.275 | 0.205 | 0.158 |
| 240 | 0.599 | 0.425 | 0.230 | 0.180 | 0.124 |
| 300 | 0.584 | 0.408 | 0.221 | 0.161 | 0.124 |
| 360 | 0.573 | 0.392 | 0.193 | 0.161 | 0.124 |
| 420 | 0.564 | 0.374 | 0.193 | 0.161 | 0.124 |
| 480 | 0.550 | 0.374 | 0.193 | 0.161 | 0.124 |
| 540 | 0.550 | 0.374 | 0.193 | 0.161 | 0.124 |
| 600 | 0.550 | 0.374 | 0.193 | 0.161 | 0.124 |
| 660 | 0.550 | 0.374 | 0.193 | 0.161 | 0.124 |
| 720 | 0.550 | 0.374 | 0.193 | 0.161 | 0.124 |
| 780 | 0.550 | 0.374 | 0.193 | 0.161 | 0.124 |
| 840 | 0.550 | 0.374 | 0.193 | 0.161 | 0.124 |
| 900 | 0.550 | 0.374 | 0.193 | 0.161 | 0.124 |
| 960 | 0.550 | 0.374 | 0.193 | 0.161 | 0.124 |
| 0   | 0.801 | 0.801 | 0.801 | 0.801 | 0.801 |
| 60  | 0.644 | 0.545 | 0.374 | 0.26  | 0.205 |
| 120 | 0.626 | 0.522 | 0.328 | 0.232 | 0.178 |
| 180 | 0.614 | 0.473 | 0.270 | 0.196 | 0.151 |
| 240 | 0.601 | 0.419 | 0.233 | 0.178 | 0.118 |
| 300 | 0.583 | 0.410 | 0.216 | 0.157 | 0.118 |
| 360 | 0.578 | 0.397 | 0.189 | 0.157 | 0.118 |
| 420 | 0.567 | 0.379 | 0.189 | 0.157 | 0.118 |
| 480 | 0.560 | 0.379 | 0.189 | 0.157 | 0.118 |
| 540 | 0.552 | 0.379 | 0.189 | 0.157 | 0.118 |
| 600 | 0.552 | 0.379 | 0.189 | 0.157 | 0.118 |
| 660 | 0.552 | 0.379 | 0.189 | 0.157 | 0.118 |

---

|     |       |       |       |       |       |
|-----|-------|-------|-------|-------|-------|
| 720 | 0.552 | 0.379 | 0.189 | 0.157 | 0.118 |
| 780 | 0.552 | 0.379 | 0.189 | 0.157 | 0.118 |
| 840 | 0.552 | 0.379 | 0.189 | 0.157 | 0.118 |
| 900 | 0.552 | 0.379 | 0.189 | 0.157 | 0.118 |
| 960 | 0.552 | 0.379 | 0.189 | 0.157 | 0.118 |

**Table.S8** Decay of the visible absorbance (518 nm) of DPPH induced by different concentrations of luteolin-Fe(III) complex.

| Time (s) | Absorbance at (Lu-Fe)/DPPH=1 | Absorbance at (Lu-Fe)/DPPH=1 | Absorbance at (Lu-Fe)/DPPH=1 |
|----------|------------------------------|------------------------------|------------------------------|
| 0        | 0.798                        | 0.801                        | 0.801                        |
| 60       | 0.739                        | 0.742                        | 0.738                        |
| 120      | 0.719                        | 0.722                        | 0.717                        |
| 180      | 0.710                        | 0.708                        | 0.713                        |
| 240      | 0.701                        | 0.697                        | 0.704                        |
| 300      | 0.694                        | 0.692                        | 0.698                        |
| 360      | 0.688                        | 0.685                        | 0.691                        |
| 420      | 0.683                        | 0.680                        | 0.685                        |
| 480      | 0.678                        | 0.675                        | 0.679                        |
| 540      | 0.673                        | 0.670                        | 0.675                        |
| 600      | 0.670                        | 0.667                        | 0.672                        |
| 660      | 0.665                        | 0.663                        | 0.668                        |
| 720      | 0.661                        | 0.659                        | 0.664                        |
| 780      | 0.657                        | 0.653                        | 0.659                        |
| 840      | 0.65                         | 0.649                        | 0.654                        |
| 900      | 0.645                        | 0.641                        | 0.650                        |
| 960      | 0.64                         | 0.635                        | 0.645                        |

**Table.S9** Decay of the visible absorbance (518 nm) of DPPH induced by luteolin-Fe(III) complex(mole ratio 4:1).

| Time (s) | Absorbance at (Lu-Fe)/DPPH=4 | Absorbance at (Lu-Fe)/DPPH=4 | Absorbance at (Lu-Fe)/DPPH=4 |
|----------|------------------------------|------------------------------|------------------------------|
| 0        | 0.798                        | 0.801                        | 0.801                        |
| 120      | 0.729                        | 0.733                        | 0.727                        |
| 240      | 0.71                         | 0.708                        | 0.713                        |
| 360      | 0.694                        | 0.696                        | 0.697                        |
| 480      | 0.683                        | 0.679                        | 0.685                        |
| 600      | 0.67                         | 0.667                        | 0.674                        |
| 720      | 0.661                        | 0.664                        | 0.657                        |
| 840      | 0.657                        | 0.654                        | 0.650                        |
| 960      | 0.657                        | 0.654                        | 0.650                        |
| 1080     | 0.657                        | 0.654                        | 0.650                        |
| 1200     | 0.657                        | 0.654                        | 0.650                        |

**Table.S10** Complex absorbance at 391 nm versus [Fe<sup>3+</sup>]/[Lu] concentrations.

| $c_{\text{Fe}^{3+}}/c_{\text{Lu}}$ | Absorbance | Absorbance | Absorbance |
|------------------------------------|------------|------------|------------|
| 0.1                                | 0.158      | 0.162      | 0.154      |
| 0.2                                | 0.208      | 0.209      | 0.212      |
| 0.3                                | 0.213      | 0.211      | 0.216      |
| 0.4                                | 0.239      | 0.242      | 0.236      |
| 0.5                                | 0.284      | 0.282      | 0.287      |
| 0.6                                | 0.344      | 0.337      | 0.341      |
| 0.7                                | 0.406      | 0.401      | 0.403      |
| 0.8                                | 0.439      | 0.434      | 0.436      |
| 0.9                                | 0.507      | 0.505      | 0.511      |
| 1                                  | 0.557      | 0.561      | 0.559      |
| 2                                  | 0.586      | 0.584      | 0.589      |
| 3                                  | 0.586      | 0.584      | 0.589      |
| 4                                  | 0.586      | 0.584      | 0.589      |
| 5                                  | 0.586      | 0.584      | 0.589      |
| 6                                  | 0.586      | 0.584      | 0.589      |
